# Supplementary material
Source: Royal Society of Chemistry journal article supplement (doi:10.1039/d6dt00836d)
Supplement: d6dt00836d1.pdf [file d6dt00836d1.pdf]

## Supplementary Information

### Rare-Earth Orthoferrites ( $R\text{FeO}_3$ , $R = \text{La}, \text{Y}$ ) as Next-Generation Electrode Materials for High-Performance Supercapacitors

Arshad Iqbal<sup>a</sup>, Abdul Hakeem Anwer<sup>b</sup>, Abdelbaki Benamor<sup>b,c</sup>, Mohd Arshad<sup>d</sup>, Naseem Ahmad<sup>e</sup>,  
Tahira Khatoon<sup>a\*</sup>, Nafees Ahmad<sup>e\*</sup>

<sup>a</sup> Department of Physics, Integral University, Lucknow, 226026, India

<sup>b</sup> Gas Processing Center, College of Engineering, Qatar University, P. O. Box 2713, Doha, Qatar,

<sup>c</sup> Department of Chemical Engineering, College of Engineering, Qatar University, P.O.Box 2713, Doha, Qatar

<sup>d</sup> Department of Physics, Aligarh Muslim University, Aligarh, 202002, India

<sup>e</sup> Department of Chemistry, Integral University, Lucknow, 226026, India

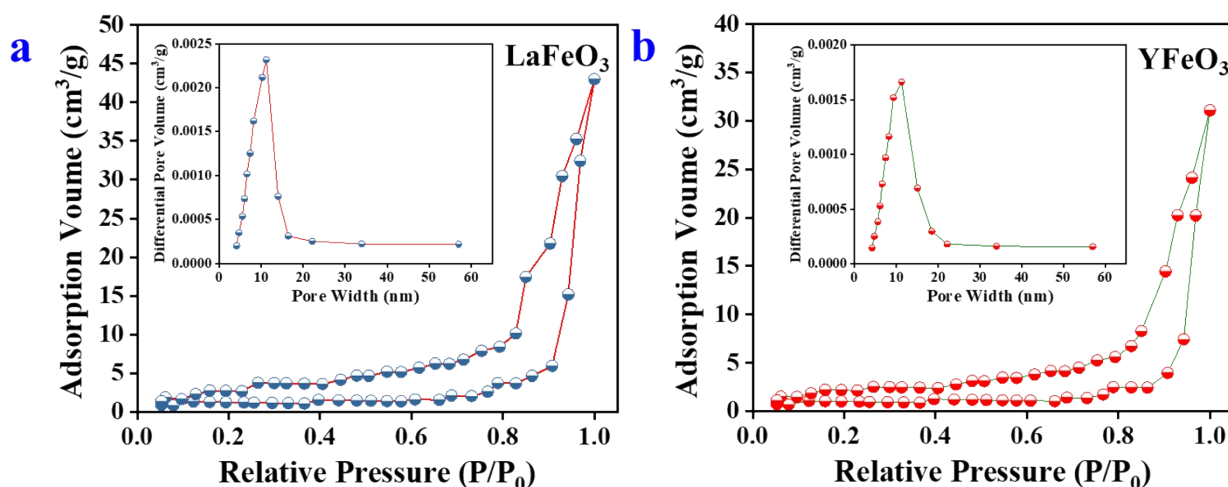

**Figure S1.** BET isotherm and pore size distribution of (a)  $\text{LaFeO}_3$  and (b)  $\text{YFeO}_3$  orthoferrites

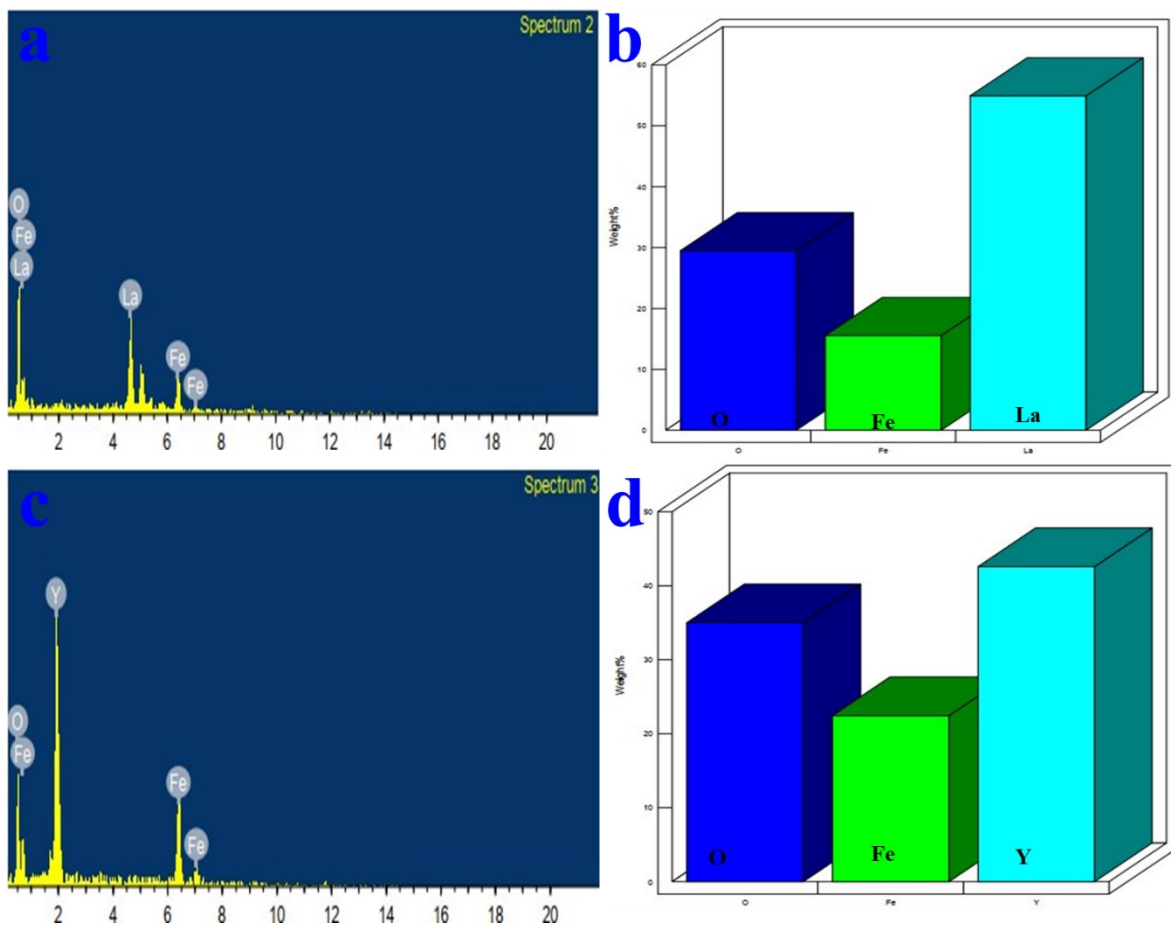

**Figure S2.** EDX spectra and the elemental composition of LaFeO<sub>3</sub> and YFeO<sub>3</sub> orthoferrites

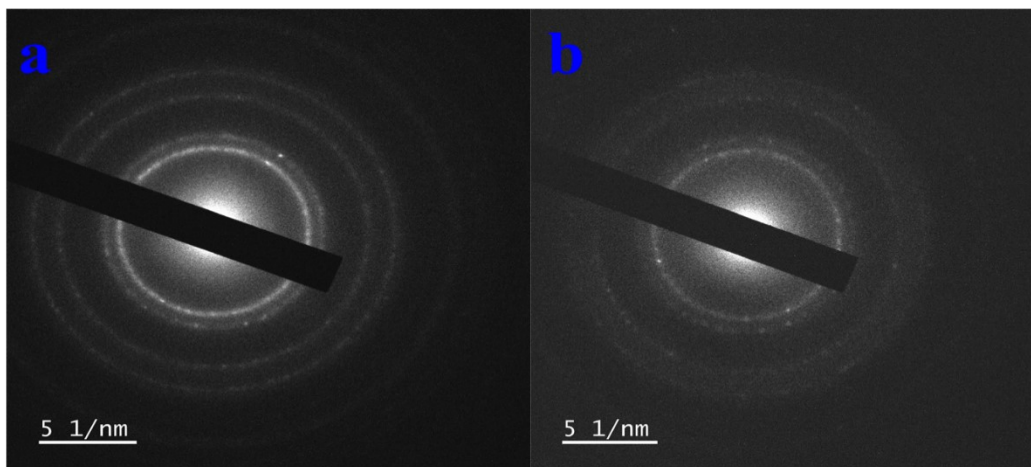

**Figure S3.** SAED pattern of (a) LaFeO<sub>3</sub> and (b) YFeO<sub>3</sub> orthoferrites

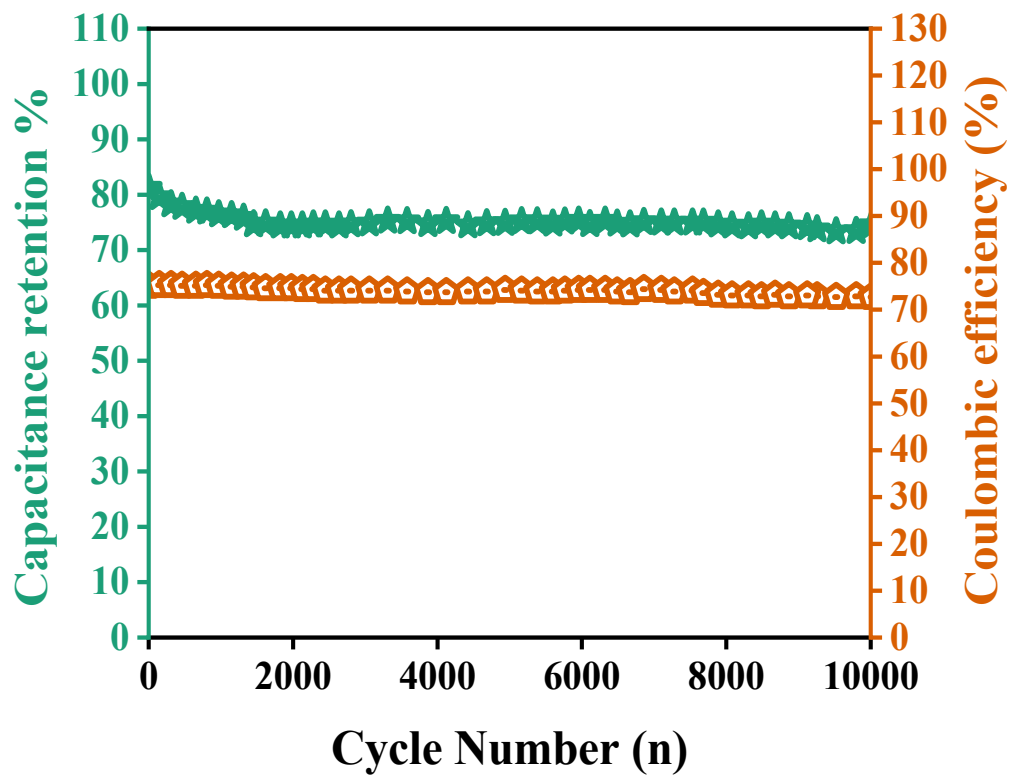

**Figure S4.** Cyclic stability of YFeO<sub>3</sub> till 10,000 cycles
